# Supplementary material for: Assessment of Training in Health Disparities in US Internal Medicine Residency Programs
Source: PubMed Central journal article supplement (PMC7417967; doi:10.1001/jamanetworkopen.2020.12757), 2020-08-10
Supplement: jamanetwopen-3-e2012757-s001.pdf [file jamanetwopen-3-e2012757-s001.pdf]

## Supplementary Online Content

Dupras DM, Wieland ML, Halvorsen AJ, Maldonado M, Willet LL, Harris L. Assessment of training in health disparities in US internal medicine residency programs. *JAMA Netw Open*. 2020;3(8):e2012757. doi:10.1001/jamanetworkopen.2020.12757

**eAppendix 1.** Association of Program Directors in Internal Medicine 2015 Annual Survey  
**eAppendix 2.** Questions on the 2015 Internal Medicine American College of Physicians In-Training Examination

This supplementary material has been provided by the authors to give readers additional information about their work.

**eAppendix 1.** Association of Program Directors in Internal Medicine 2015 Annual Survey

SECTION V: Health Care Disparities Training (Please ENTER ALL NUMBERS WITHOUT COMMAS to avoid truncation at the comma.)

Has your Institution had a Clinical Learning Environment Review (CLER) by the ACGME visit?

- No
- Yes

Do you anticipate one in the next 6 months?

- No
- Yes

Is data on differences in health care benchmarks based on patient diversity or at risk populations disseminated at your institution?

- No
- Yes
- Don't know

How committed do you believe your institution is to addressing disparities in health care?

- Not committed
- Unsure
- Somewhat committed
- Strongly committed

Do some of your resident quality improvement projects address health care disparities?

- No
- Yes
- I don't know

***Branch point question: Answer selected determines subsequent questions***

Does your training program have an educational curriculum in health care disparities?

- No
- Yes

**Following questions answered by those who answered “yes” to above question:**

What were barriers to development of a health disparities curriculum? (Mark all that apply.)

- No barriers
- Institutional culture
- Institutional support
- Lack of need
- Faculty uninterested in teaching
- Faculty lack skills to teach
- Lack of learner interest
- Insufficient time in curriculum
- Financial constraints
- Lack of importance in the curriculum
- Other, please specify: \_\_\_\_\_

What were barriers to implementation of a health disparities curriculum? (Mark all that apply.)

- No barriers
- Institutional culture
- Institutional support
- Lack of need
- Faculty uninterested in teaching
- Faculty lack skills to teach
- Lack of learner interest
- Insufficient time in curriculum
- Financial constraints
- Lack of importance in the curriculum
- Other, please specify: \_\_\_\_\_

Please answer the following questions about the curriculum.

Which of the following best describes the format of the curriculum?

- Required by the Institution
- Only required by residency training program
- Elective for residents
- Component of other curriculum (quality improvement, other)

What curriculum do you use?

- Developed at our Institution
- External curriculum. Please provide name of program below: \_\_\_\_\_

How many hours in your program are dedicated education in health care disparities? \_\_\_\_\_

Does the curriculum vary between years?

- No
- Yes

What methods are used for this education? (Mark all that apply.)

- Lecture
- Discussion (group)
- Small groups
- Case scenarios
- Clinical experience
- Interviewing other cultures (at risk groups)
- eLearning
- Blogs
- Audio/video
- Simulation
- Role play
- Cultural immersion
- Other, please specify: \_\_\_\_\_

Which topics related to disparities of care are covered in your educational curriculum? (Mark all that apply.)

- Race and/or ethnicity
- Gender
- Socioeconomic status
- Sexual orientation and/or gender identity
- Religious beliefs
- Limited English proficiency
- Other, please specify: \_\_\_\_\_

How would you rate the quality of your program's health disparities education?

- Poor
- Fair
- Good
- Very good
- Excellent

How do you measure outcomes of the curriculum (Mark all that apply.)

- We don't measure
- Assessment of change in attitude(s)
- Test of knowledge
- Direct observation of resident skills/behaviors
- Clinical patient outcomes
- Other, please specify: \_\_\_\_\_

**Following questions answered by those answering “no” to presence of curriculum:**

What are barriers to development of a health disparities curriculum? (Mark all that apply.)

- No barriers
- Institutional culture
- Institutional support
- Lack of need
- Faculty uninterested in teaching
- Faculty lack skills to teach
- Lack of learner interest
- Insufficient time in curriculum
- Financial constraints
- Lack of importance in the curriculum
- Other, please specify: \_\_\_\_\_

Do you plan to develop education curriculum on health care disparities?

- No
- Yes
- I don't know

How soon do you plan to implement an educational curriculum on this topic?

Number of \_\_\_ days \_\_\_ months \_\_\_ years

*End of survey question section.*

**eAppendix 2.** Questions on the 2015 Internal Medicine American College of Physicians In-Training Examination

1. Approximately what percentage of the patients you care for is underserved, uninsured, unemployed or homeless? (Select one)
  - <10%
  - 10-25%
  - 26-50%
  - 51-75%
  - Over 75%
  - Not Sure
  
2. During your residency, have you received any training in how to care for patients who are underserved, uninsured, unemployed or homeless?
  - Yes
  - No
  
3. How would you rate the quality of this residency training? (Likert Scale Response)
  - 1 Poor
  - 2 Fair
  - 3 Good
  - 4 Very Good
  - 5 Excellent
